# Supplementary material for: Interaction of Citrinin with Human Serum Albumin
Source: PubMed Central journal article supplement (PMC4690121; doi:10.3390/toxins7124871), 2015-12-01
Supplement: toxins-07-04871-s001.pdf [file toxins-07-04871-s001.pdf]

# Supplementary Materials: Interaction of Citrinin with Human Serum Albumin

Miklós Poór, Beáta Lemli, Mónika Bálint, Csaba Hetényi, Nikolett Sali, Tamás Kőszegi and Sándor Kunsági-Máté

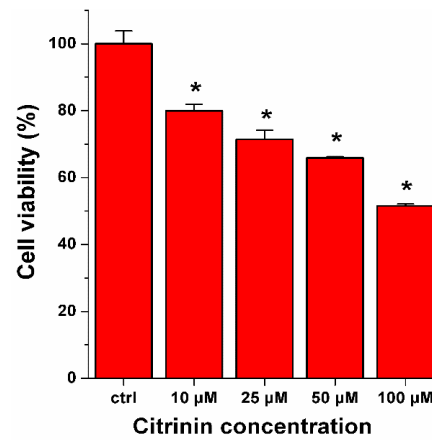

**Figure S1.** Effects of increasing CIT concentrations on viability of MDCK cells after 24-h treatment in FBS-free medium (\*  $p < 0.05$ ).
